# Supplementary material
Source: publisher figshare collection journal article supplement (https://acs.figshare.com/ndownloader/files/12538133)
Supplement: Supplementary file 1 [file 12538133]

# SUPPORTING INFORMATION

## Immune Profiling of Polysaccharide Submicron Vesicles

*Chiara C. Toma<sup>1†</sup>, Alessandra Aloisi<sup>\*2†</sup>, Valentina Bordoni<sup>3</sup>, Riccardo Di Corato<sup>1</sup>, Martina Rauner<sup>4</sup>, Gianaurelio Cuniberti<sup>5</sup>, Lucia G. Delogu<sup>\*3,6,7</sup> and Rosaria Rinaldi<sup>1,2,8</sup>*

*\*corresponding authors: [alessandra.aloisi@cnr.it](mailto:alessandra.aloisi@cnr.it), [lgdelogu@uniss.it](mailto:lgdelogu@uniss.it), [lgdelogu@units.it](mailto:lgdelogu@units.it)*

<sup>†</sup> CNR-NANO Institute of Nanoscience

1 University of Salento, Mathematics and Physics “E. De Giorgi” Department, Via Monteroni, University Campus, 73100 Lecce, Italy

2 CNR-IMM Institute for Microelectronics and Microsystems, Via Monteroni, University Campus, A3 Building, 73100 Lecce, Italy

3 University of Sassari, Department of Chemistry and Pharmacy, via Muroni 23, 07100 Sassari, Italy

4 Technische Universität Dresden, Medical Faculty, Department of Medicine III & Center for Healthy Aging, 01069 Dresden, Germany

5 Max Bergmann Center of Biomaterials and Institute for Materials Science, Dresden University of Technology, 01069 Dresden, Germany

6 University of Trieste, Department of Chemical and Pharmaceutical Sciences, Trieste, Italy via Licio Giorgeri 1, 34134, Trieste, Italy

7 Fondazione Istituto di Ricerca Pediatrica Città della Speranza, corso Stati Uniti 4 35127 Padova, Italy

8 University of Salento – ISUFI, Via Monteroni, University Campus, 73100 Lecce, Italy

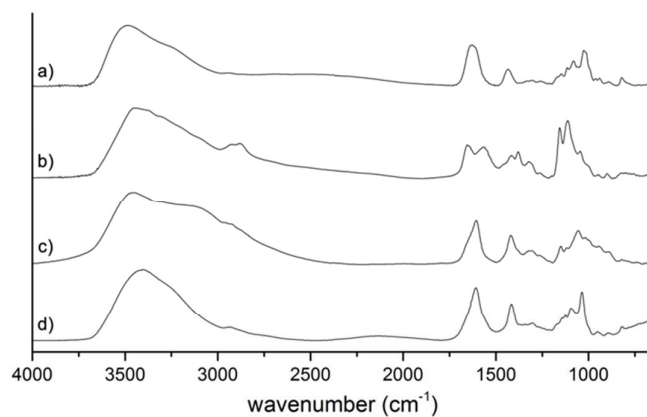

**Figure S1.** IR spectra of Ca-ALG (a), CS (b), PEC bilayer films (c) and Na-ALG (d).

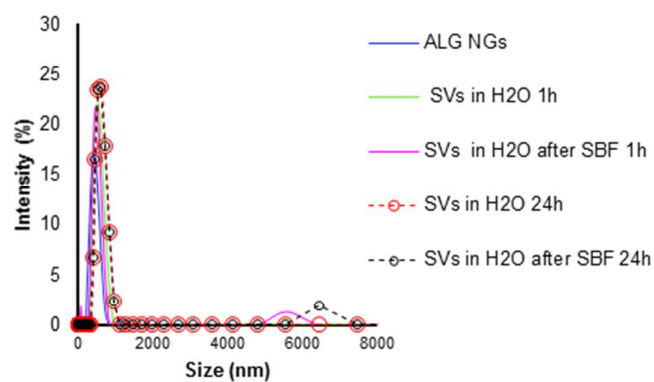

**Figure S2.** Intensity-weighted size distribution of ALG/CS SVs in UPW and in SBF (24 h of incubation) obtained from DLS measurements.

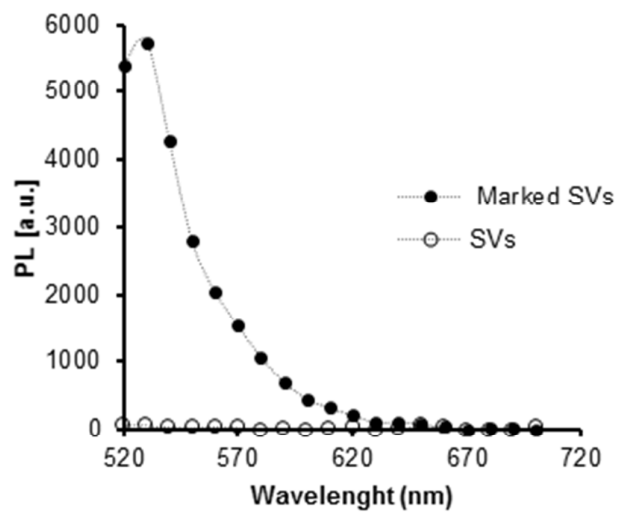

**Figure S3.** Photoluminescence spectra of fluorescent SVs (with labelled CS) and bare SVs. Fluorescent SVs were modified by labelling their CS external layer with the Abberion STAR 488 dye (Sigma-Aldrich). Fluorescent SVs exhibited a peak of emission at 530 nm ( $\lambda_{\text{ex}}$  500 nm).
